# Supplementary material for: The adsorption of Cu on the CeO2(110) surface
Source: Royal Society of Chemistry journal article supplement (doi:10.1039/c7cp04144f), 2017-01-01
Supplement: c7cp04144f1.pdf [file c7cp04144f1.pdf]

## The adsorption of Cu on the CeO<sub>2</sub>(110) surface

Arunabhram Chutia,<sup>\*1,2</sup> Emma K. Gibson,<sup>1,2</sup> Matthew R. Farrow,<sup>2</sup> Peter P. Wells,<sup>1,3,4</sup> David O. Scanlon,<sup>2,4</sup> Nikos Dimitratos,<sup>5</sup> David J. Willock,<sup>5</sup> C. Richard A. Catlow<sup>\*1,2,5</sup>

<sup>1</sup>*UK Catalysis Hub, RCaH, Rutherford Appleton Laboratory, Didcot, OX11 0FA, UK.*

<sup>2</sup>*UCL Chemistry, Gordon Street, London, WC1H 0AJ, UK.*

<sup>3</sup>*School of Chemistry, University of Southampton, Southampton, 50718J, UK.*

<sup>4</sup>*Diamond Light Source Ltd., Diamond House, Harwell Science and Innovation Campus, Didcot, Oxfordshire OX11 0DE, UK.*

<sup>5</sup>*Cardiff Catalysis Institute, School of Chemistry, Cardiff University, Cardiff, CF10 3AT, UK.*

Email: a.chutia@ucl.ac.uk, c.r.a.catlow@ucl.ac.uk

To construct models of CeO<sub>2</sub> with Cu(II) incorporated, we substitute a Ce atom with a Cu<sup>2+</sup> ion either on the surface using the CeO<sub>2</sub>(110) slab representation or in the bulk material and create an oxygen vacancy for charge compensation. We refer to the Cu<sup>2+</sup> ions replacing surface and bulk ceria as Cu<sub>surf</sub> and Cu<sub>bulk</sub> respectively. On visualizing the calculated spin density of these systems we see that it is highly localized around the Cu centres and nearby O-atoms in both bulk and surface substitution positions, (Figure S1). The shape of this spin density indicates that there is bonding between Cu d and O p-orbitals.

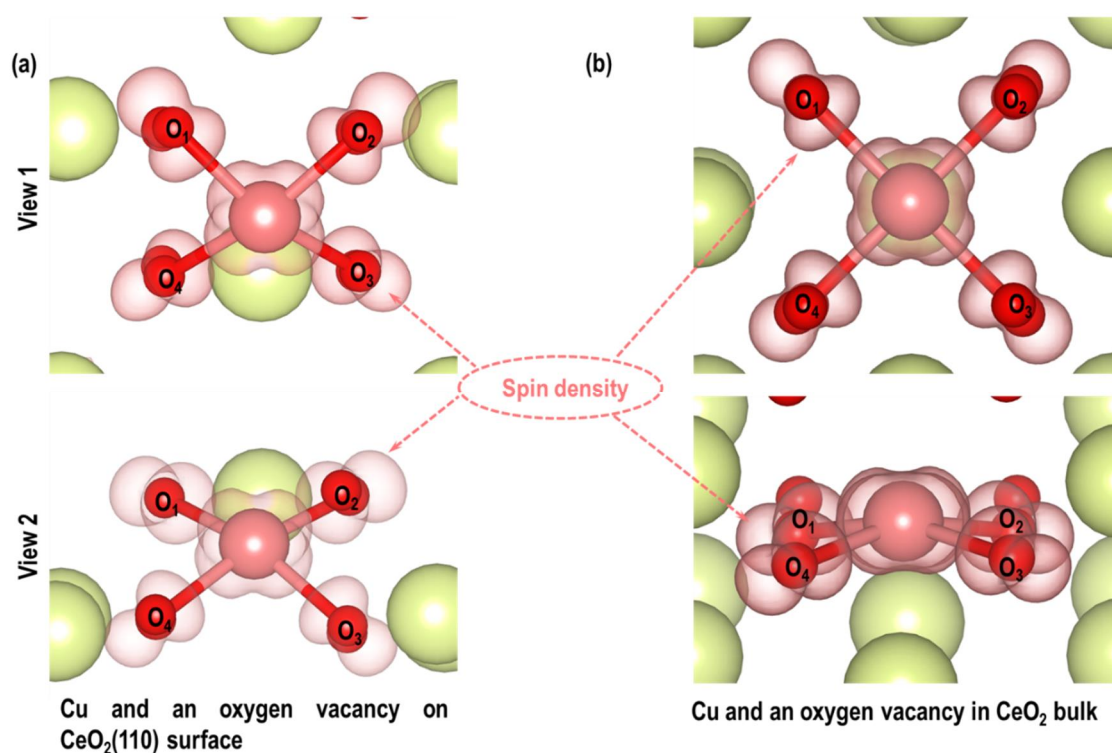

**Figure S1.** Spin-density localised around Cu–O moiety (a) on the surface of CeO<sub>2</sub>(110). The O<sub>n(=1-4)</sub> represents the O-atoms in close proximity of Cu-atoms. (b) Spin-density localised around Cu–O moiety in the bulk of CeO<sub>2</sub>.
